# Supplementary material for: Tetracyclic Thioxanthene Derivatives: Studies on Fluorescence and Antitumor Activity
Source: MDPI journal article supplement (doi:10.3390/molecules26113315), 2021-05-31
Supplement: s1 [file s1]

## Supporting Information

# Tetracyclic thioxanthene derivatives: studies on fluorescence and antitumor activity

**Fernando Durães**<sup>1,2</sup>, **Patrícia M. A. Silva**<sup>3</sup>, **Pedro Novais**<sup>3,4</sup>, **Isabel Amorim**<sup>5</sup>, **Luís Gales**<sup>6,7</sup>, **Cátia I. C. Esteves**<sup>8</sup>, **Samuel Guieu**<sup>8,9</sup>, **Hassan Bousbaa**<sup>3,\*</sup>, **Madalena Pinto**<sup>1,2</sup>, and **Emília Sousa**<sup>1,2,\*</sup>

<sup>1</sup> Laboratory of Organic and Pharmaceutical Chemistry, Department of Chemical Sciences, Faculty of Pharmacy, University of Porto, Rua de Jorge Viterbo Ferreira, 228, 4050-313 Porto, Portugal; fduraes5@gmail.com;

<sup>2</sup> CIIMAR-Interdisciplinary Centre of Marine and Environmental Research, University of Porto, Novo Edifício do Terminal de Cruzeiros do Porto de Leixões, Avenida General Norton de Matos, S/N, 4450-208 Matosinhos, Portugal; madalena@ff.up.pt

<sup>3</sup> CESPU, Institute of Research and Advanced Training in Health Sciences and Technologies (IINFACETS), Rua Central de Gandra, 1317, 4585-116 Gandra, Portugal; hassan.bousbaa@iucs.cespu.pt; patricia.silva@cespu.pt; pedro.ha.novais@gmail.com

<sup>4</sup> Department of Biochemistry, Faculty of Sciences, University of Porto, Rua do Campo Alegre, s/n, 4169-007 Porto, Portugal

<sup>5</sup> GreenUPorto (Sustainable Agrifood Production) Research CenterDepartment of Biology, Faculty of Sciences, University of Porto, Rua do Campo Alegre, s/n, 4169-007 Porto, Portugal; [mpamorim@fc.up.pt](mailto:mpamorim@fc.up.pt)

<sup>6</sup> Department of Molecular Biology, ICBAS - Instituto de Ciências Biomédicas Abel Salazar, University of Porto, Porto, Portugal; lgales@ibmc.up.pt

<sup>7</sup> Bioengineering & Synthetic Microbiology, I3S – Instituto de Investigação e Inovação em Saúde, University of Porto, Porto, Portugal

<sup>8</sup> LAQV-REQUIMTE, Department of Chemistry, University of Aveiro, 3810-193 Aveiro, Portugal; [sguiou@ua.pt](mailto:sguiou@ua.pt); [catiaiesteves@ua.pt](mailto:catiaiesteves@ua.pt)

<sup>9</sup> CICECO-Aveiro Institute of Materials, Department of Chemistry, University of Aveiro, 3810-193 Aveiro, Portugal

\* Correspondence: hassan.bousbaa@iucs.cespu.pt, esousa@ff.up.pt



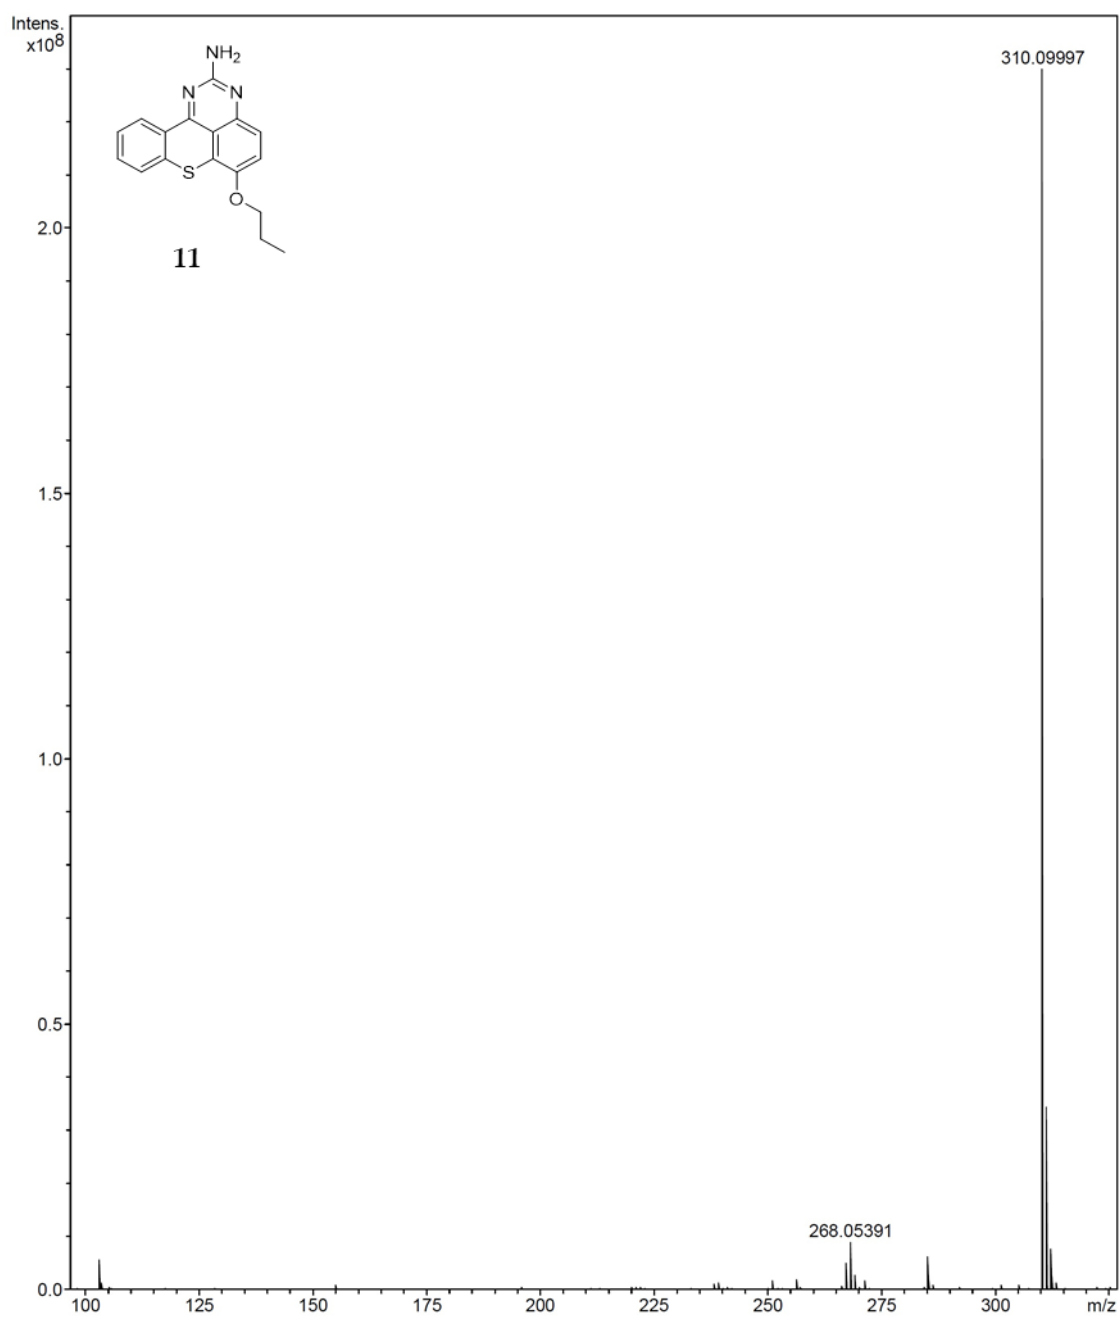

| Meas. m/z | Formula                                           | m/z       | err [ppm] |
|-----------|---------------------------------------------------|-----------|-----------|
| 310.09997 | C <sub>17</sub> H <sub>16</sub> N <sub>3</sub> OS | 310.10065 | 2.87      |

**Figure S2.** Electrospray ESI data for compound 11.

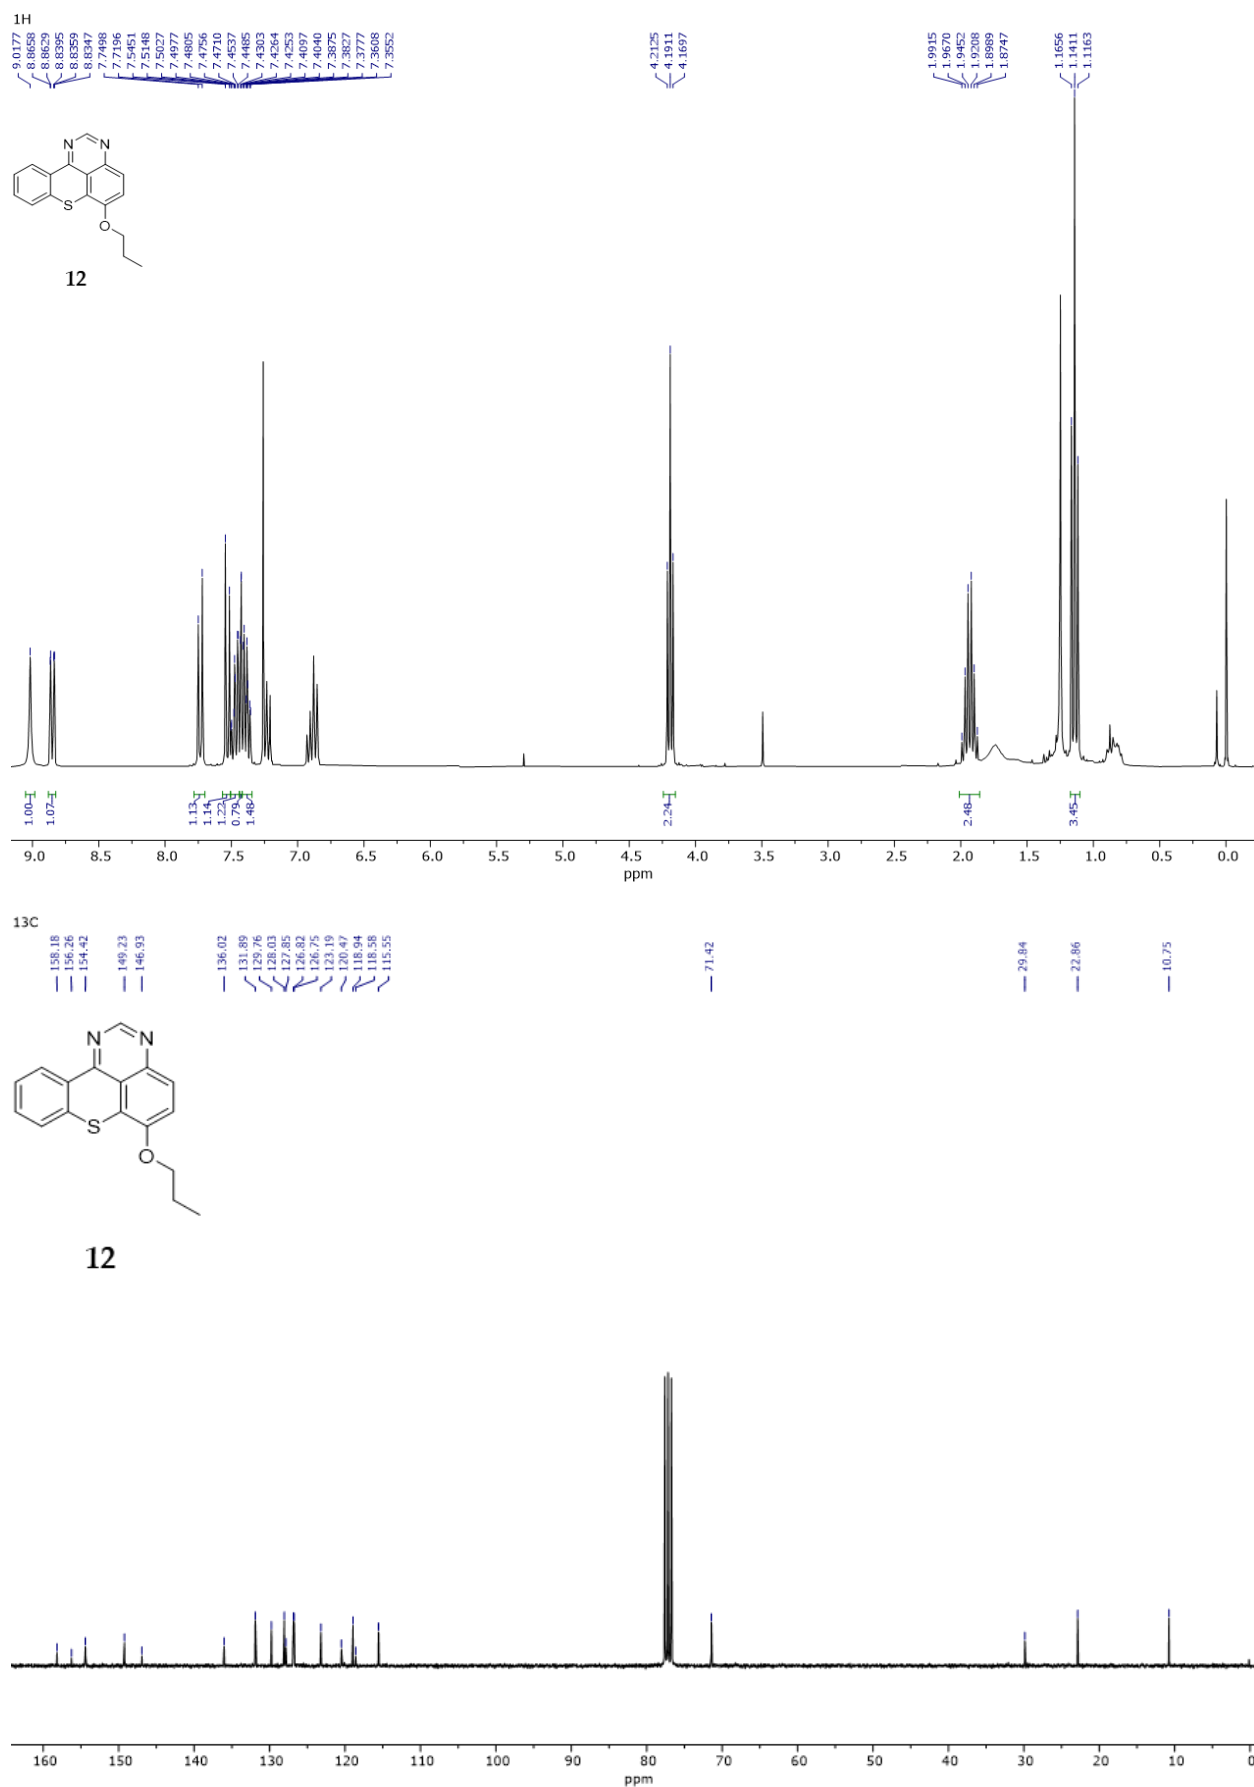

**Figure S3.** <sup>1</sup>H NMR (300.13 MHz, CDCl<sub>3</sub>) and <sup>13</sup>C NMR (75.48 MHz, CDCl<sub>3</sub>) for compound 12.

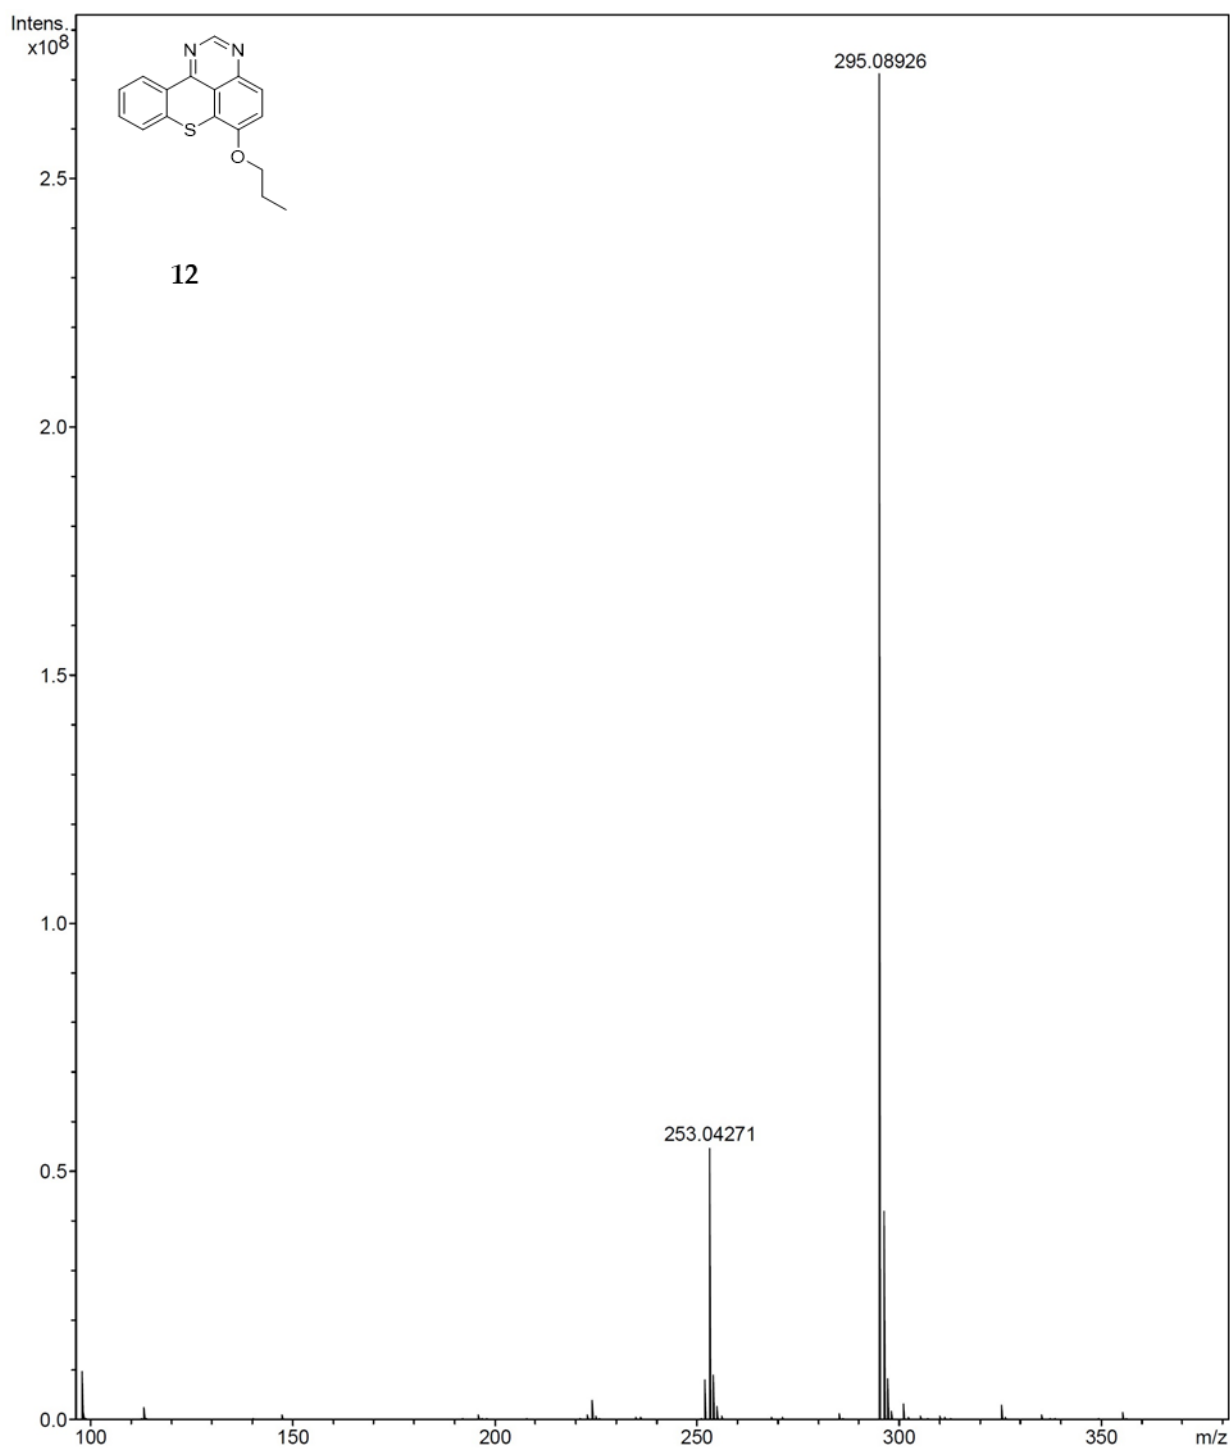

| Meas. m/z | Formula                                           | m/z       | err [ppm] |
|-----------|---------------------------------------------------|-----------|-----------|
| 295.08926 | C <sub>17</sub> H <sub>15</sub> N <sub>2</sub> OS | 295.08995 | 2.36      |

**Figure S4.** Electrospray ESI data for compound 12.

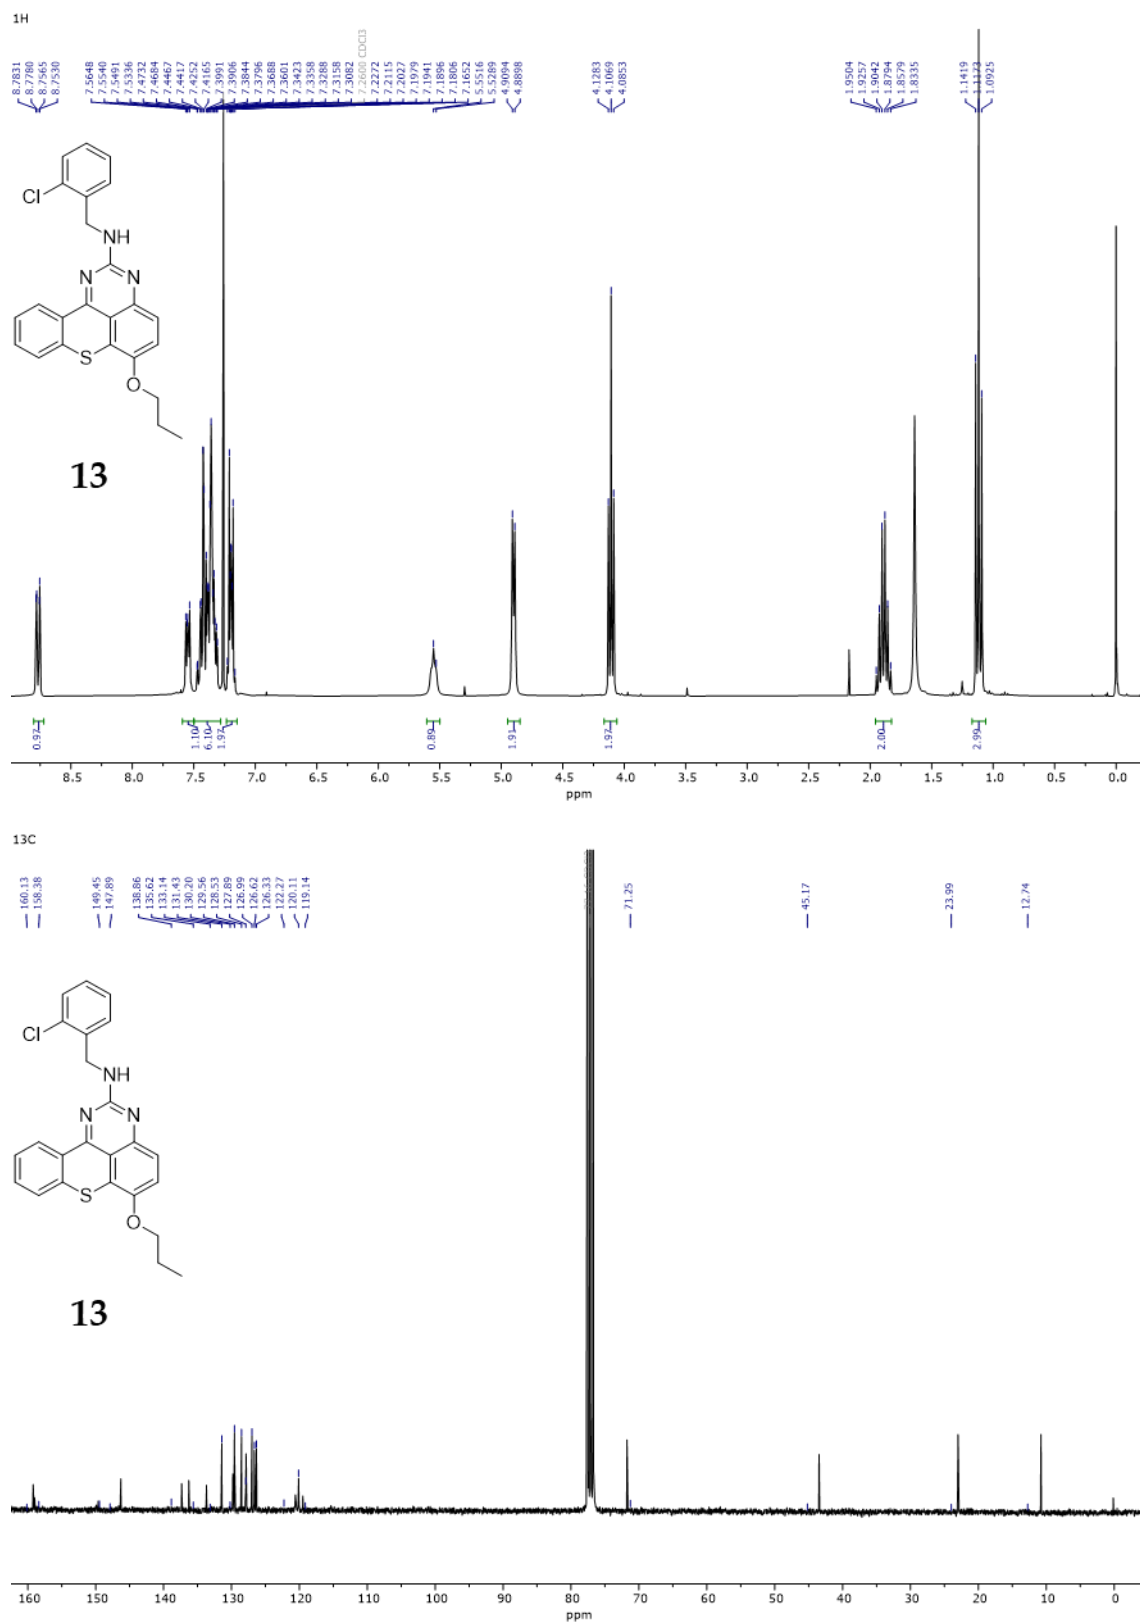

**Figure S5.** <sup>1</sup>H NMR (300.13 MHz, CDCl<sub>3</sub>) and <sup>13</sup>C NMR (75.48 MHz, CDCl<sub>3</sub>) for compound **13**.

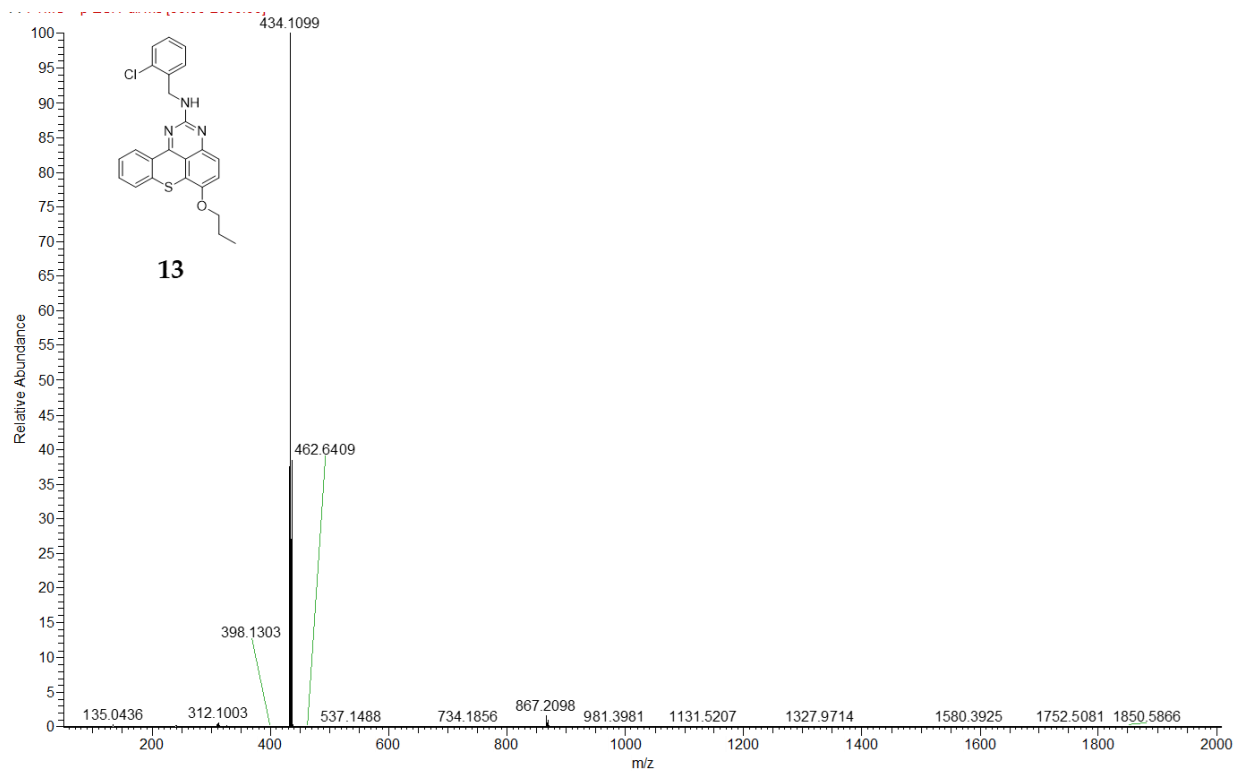

| Meas. m/z | Formula                                             | m/z      | err [ppm] |
|-----------|-----------------------------------------------------|----------|-----------|
| 434.1099  | C <sub>24</sub> H <sub>20</sub> ClN <sub>3</sub> OS | 434.1094 | 1.1518    |

**Figure S6.** Electrospray ESI data for compound 13.

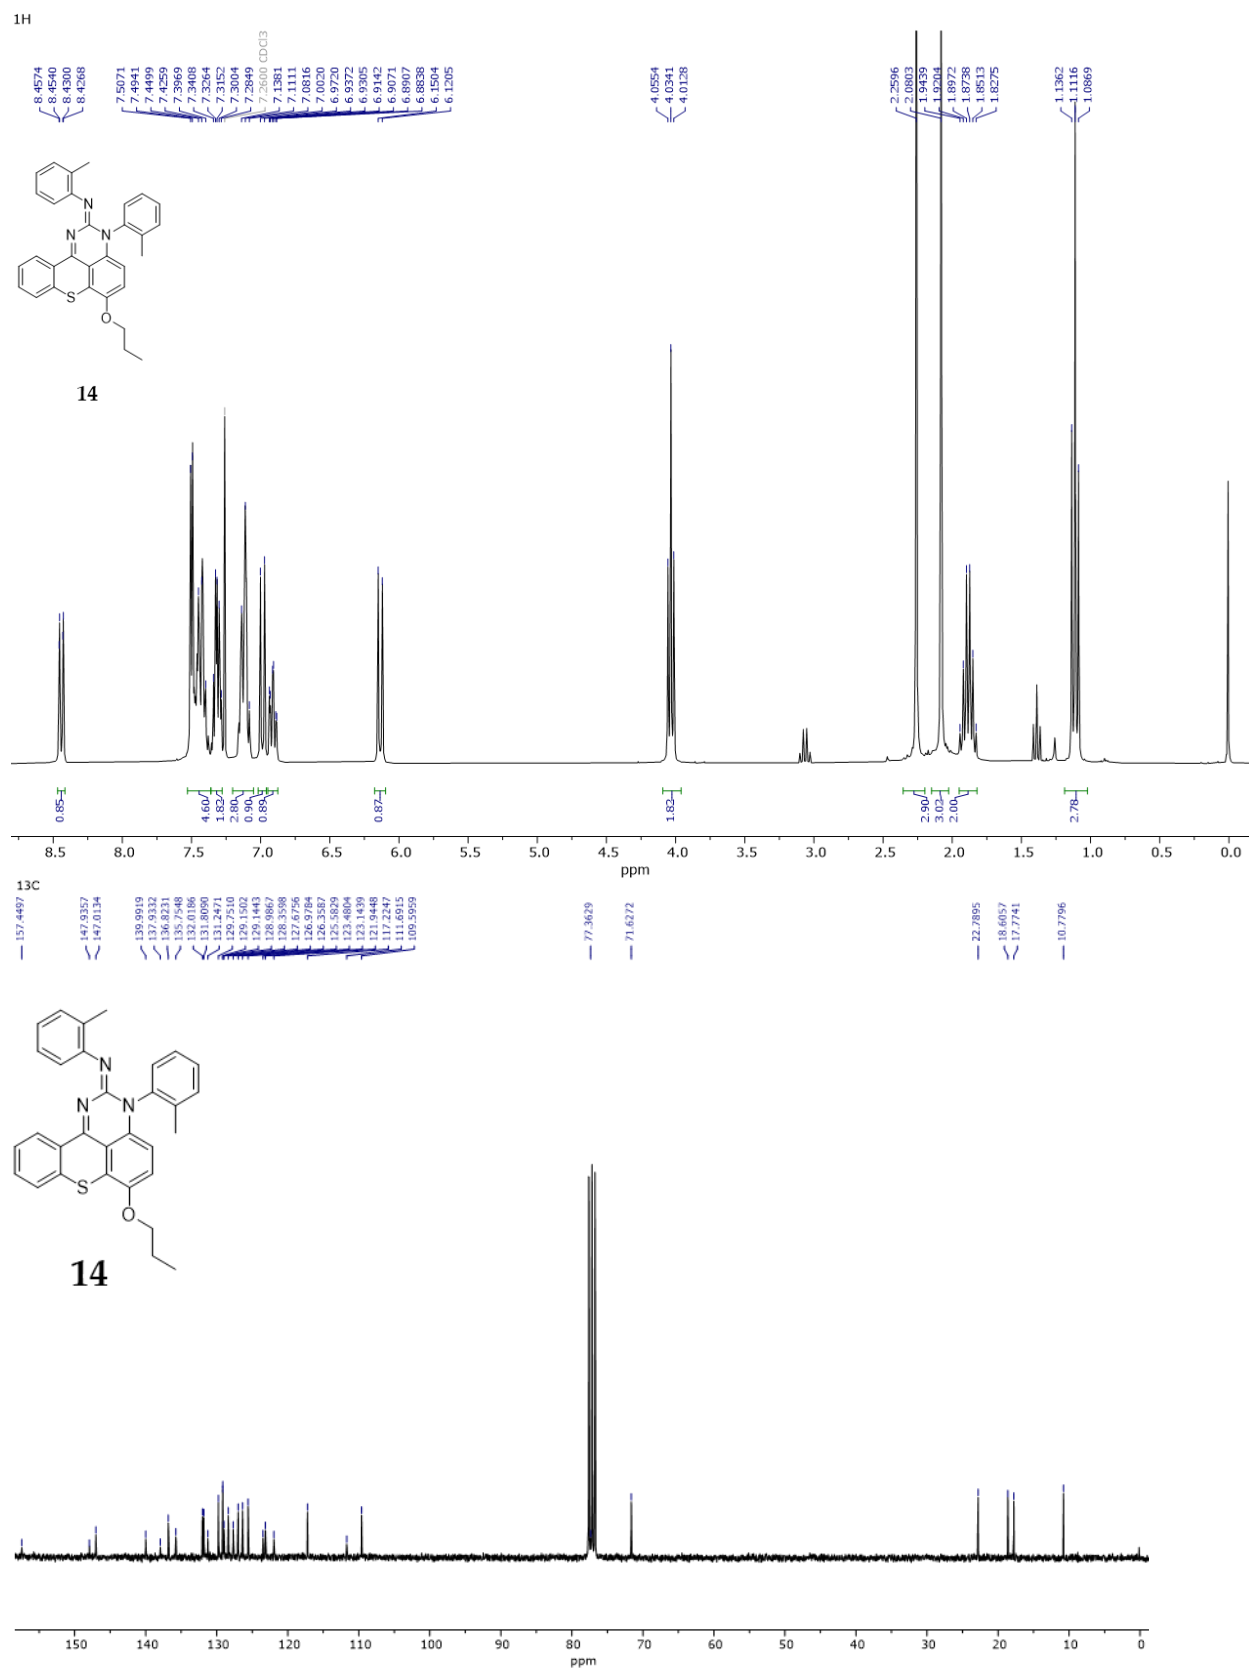

Figure S7. <sup>1</sup>H NMR (300.13 MHz, CDCl<sub>3</sub>) and <sup>13</sup>C NMR (75.48 MHz, CDCl<sub>3</sub>) for compound 14.



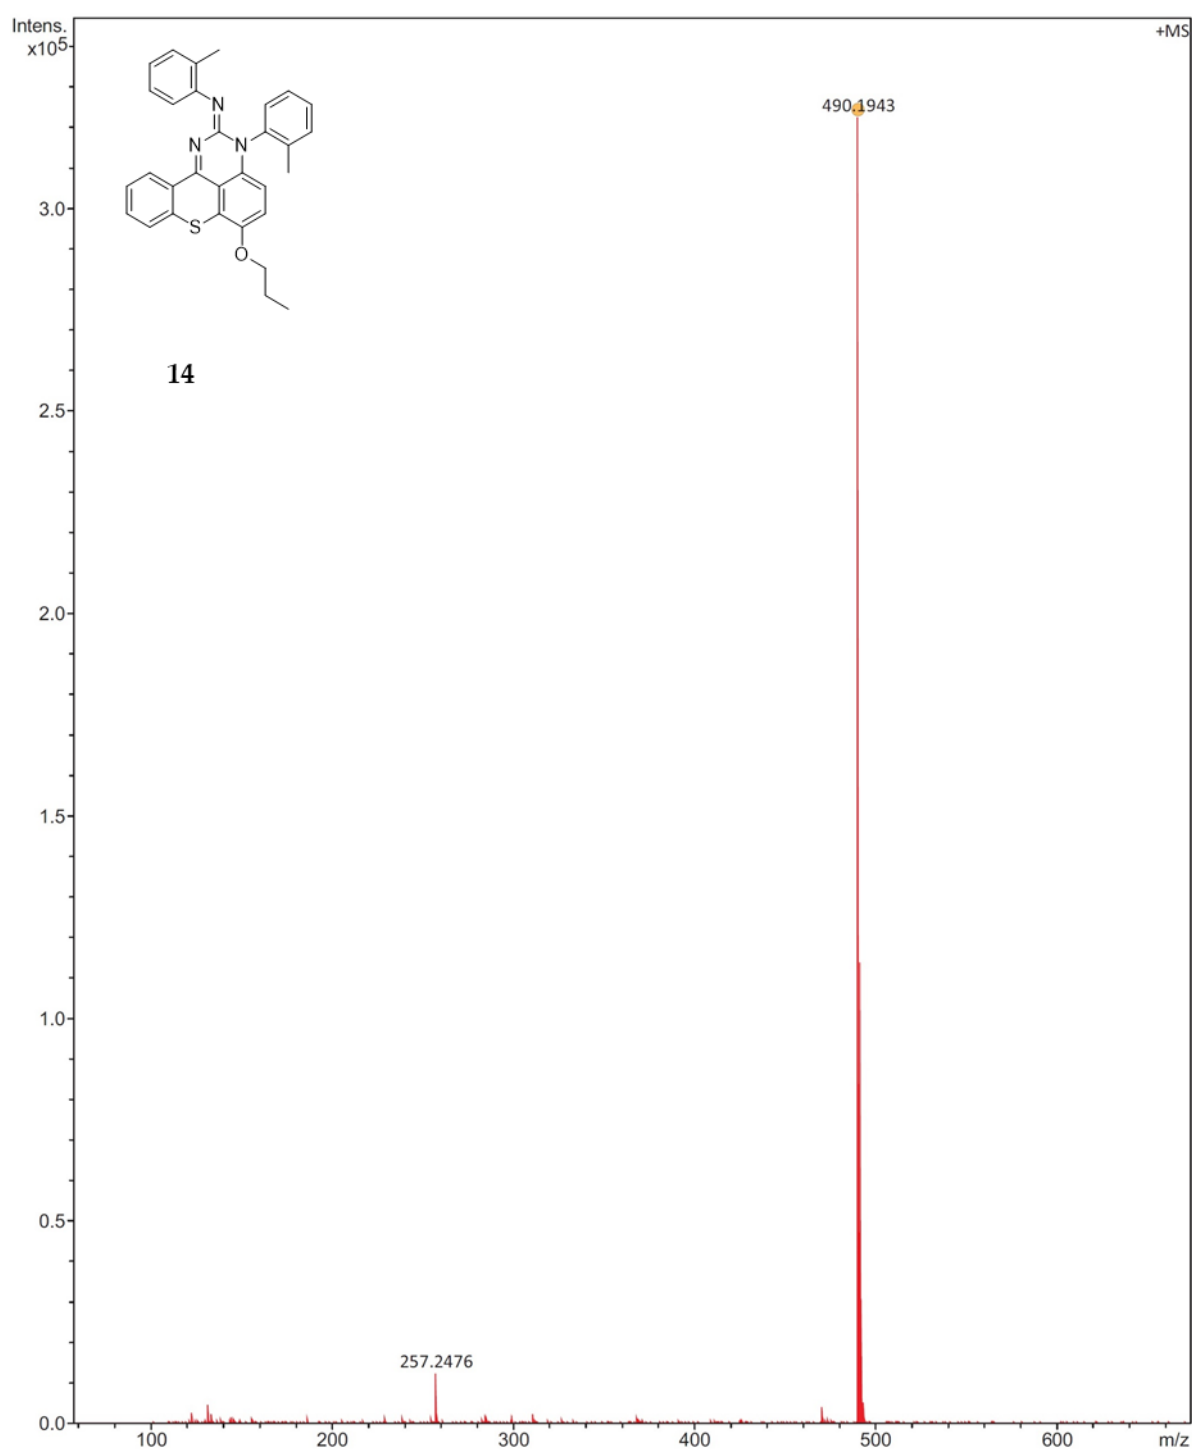

| Meas. $m/z$ | Formula             | $m/z$    | err [ppm] |
|-------------|---------------------|----------|-----------|
| 490.1943    | $C_{31}H_{28}N_3OS$ | 490.1948 | 1.0       |

**Figure S8.** Electrospray ESI data for compound 14.
